# Supplementary material for: Cathodic synthesis of a Cu-catecholate metal–organic framework
Source: Royal Society of Chemistry journal article supplement (doi:10.1039/d0ce01651a), 2021-01-01
Supplement: d0ce01651a1.pdf [file d0ce01651a1.pdf]

## Supporting information

# Cathodic synthesis of Cu-catecholate metal-organic framework

Pingping Li<sup>a</sup>, Xiaofei Shi<sup>a</sup>, Yunling Wu<sup>a</sup>, Min Song<sup>a</sup>, Yapeng Lai<sup>b</sup>, Huijun Yu<sup>b\*</sup>, and Guang Lu<sup>a\*</sup>

<sup>a</sup>Institute of Functional Nano & Soft Materials (FUNSOM), Jiangsu Key Laboratory for Carbon-Based Functional Materials & Devices, Soochow University, Suzhou 215123, China

<sup>b</sup>Department of Cell Biology, School of Biology & Basic Medical Sciences, Soochow University, Suzhou 215123, China

\* Guang Lu – Email: [glu@suda.edu.cn](mailto:glu@suda.edu.cn)

\* Huijun Yu – Email: [hjyu@suda.edu.cn](mailto:hjyu@suda.edu.cn)

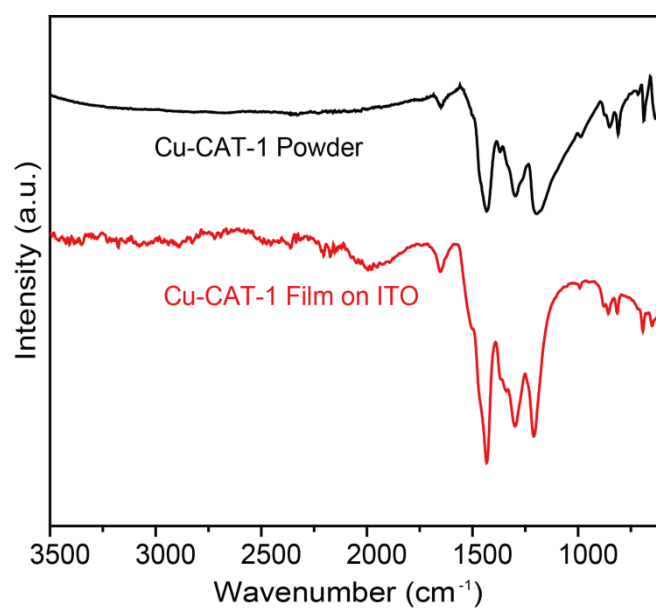

**Figure S1.** FT-IR spectra of the Cu-CAT-1 powder (black) and cathodically deposited Cu-CAT-1 film (red) on ITO substrate.

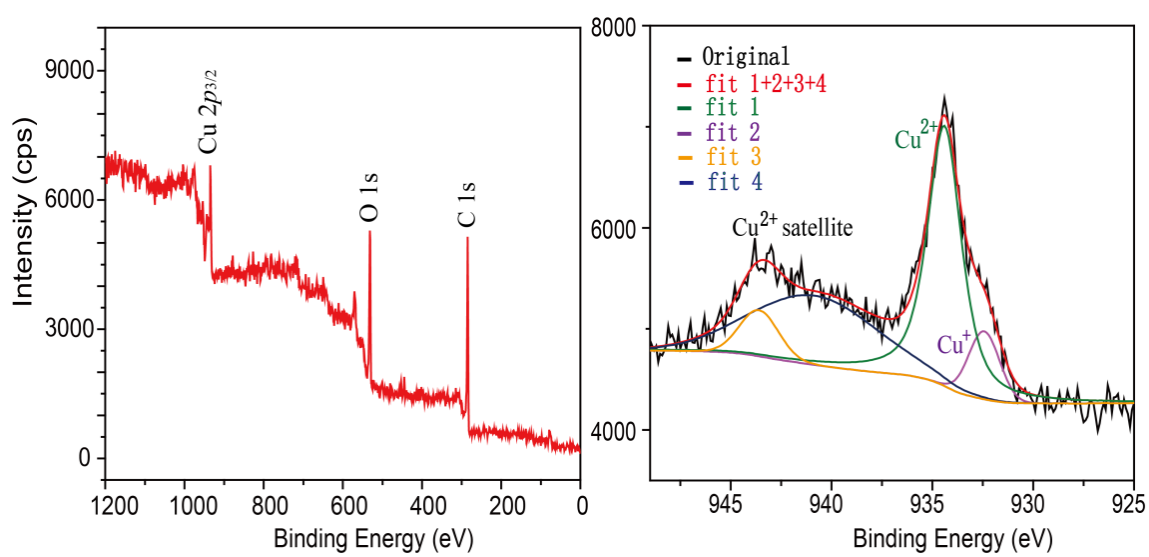

**Figure S2.** XPS spectra of Cu-CAT-1 film: a) full survey scan; b) high resolution spectrum of Cu 2p<sub>3/2</sub> scan.

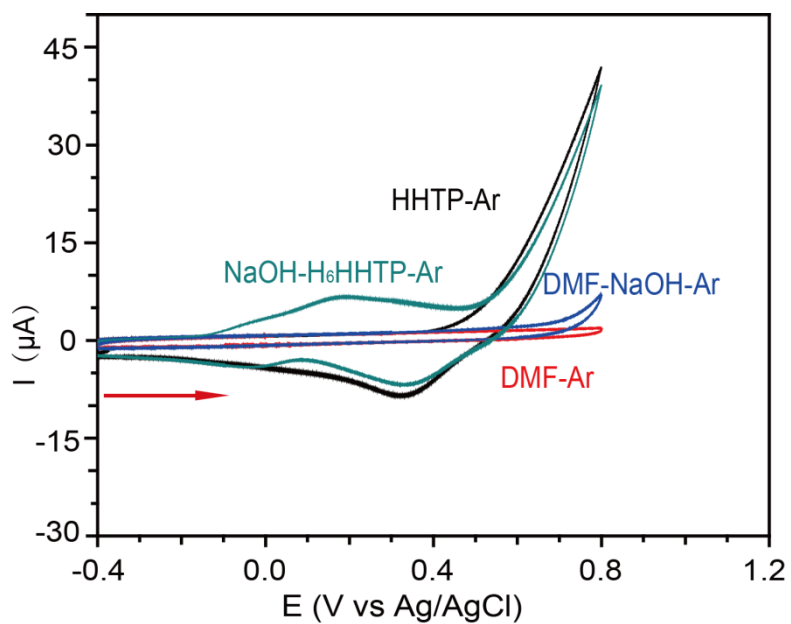

**Figure S3.** CV curves recorded for the Ar-saturated DMF background and H<sub>6</sub>HHTP solutions with/without addition of NaOH (20 mM) on GC electrode at room temperature and at a scan rate of 100 mV/s.

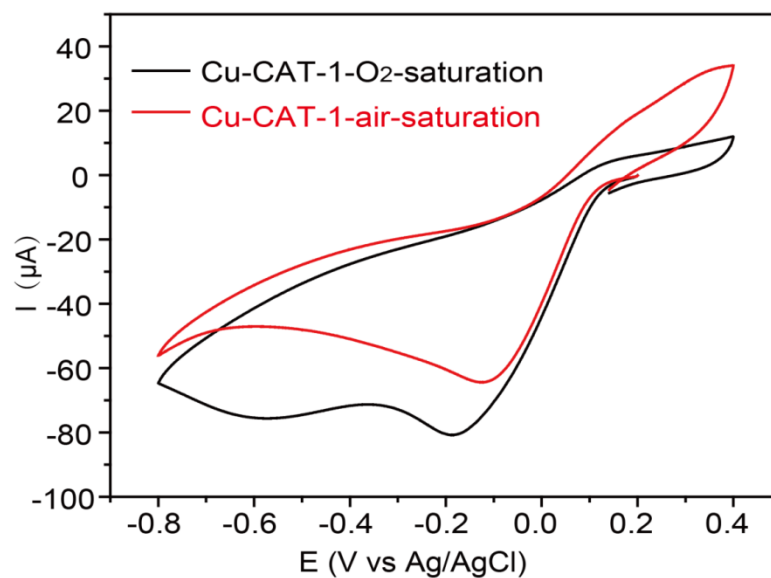

**Figure S4.** CV curves of air-saturated (red) and oxygen-saturated (black) Cu-CAT-1 precursor solutions containing  $\text{Cu}(\text{NO}_3)_2$  (5 mM) and  $\text{H}_6\text{HHP}$  (3.33 mM) measured on a glass carbon electrode at scan rates of 100 mV/s and with  $(\text{NBu}_4)\text{PF}_6$  (10 mM) as the supporting electrolyte.

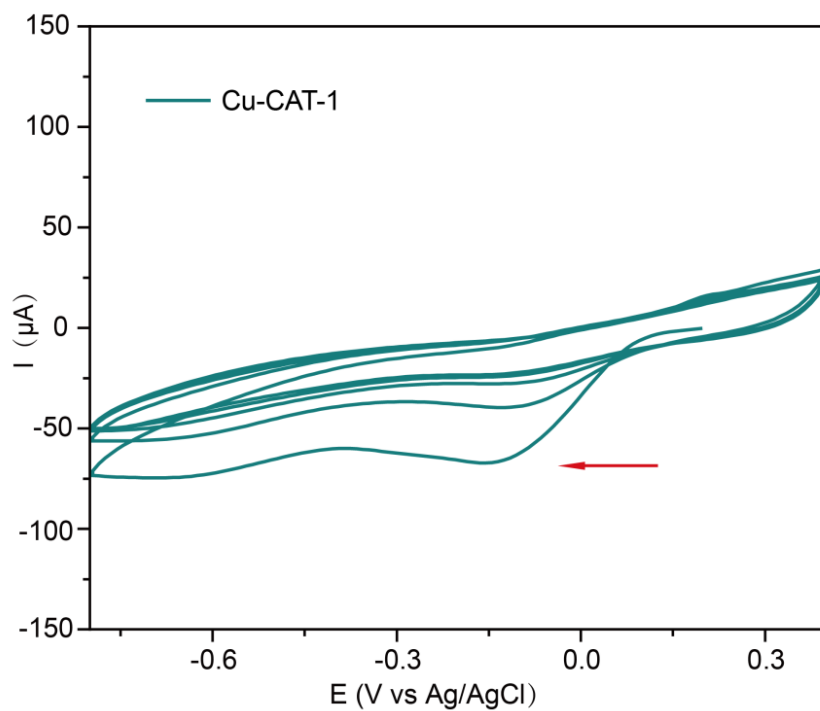

**Figure S5.** Consecutive CV curves of air-saturated Cu-CAT-1 precursor solutions containing  $\text{Cu}(\text{NO}_3)_2$  (5 mM) and  $\text{H}_6\text{HHP}$  (3.33 mM) measured on a glass carbon electrode at scan rates of 100 mV/s and with  $(\text{NBu}_4)\text{PF}_6$  (10 mM) as the supporting electrolyte.

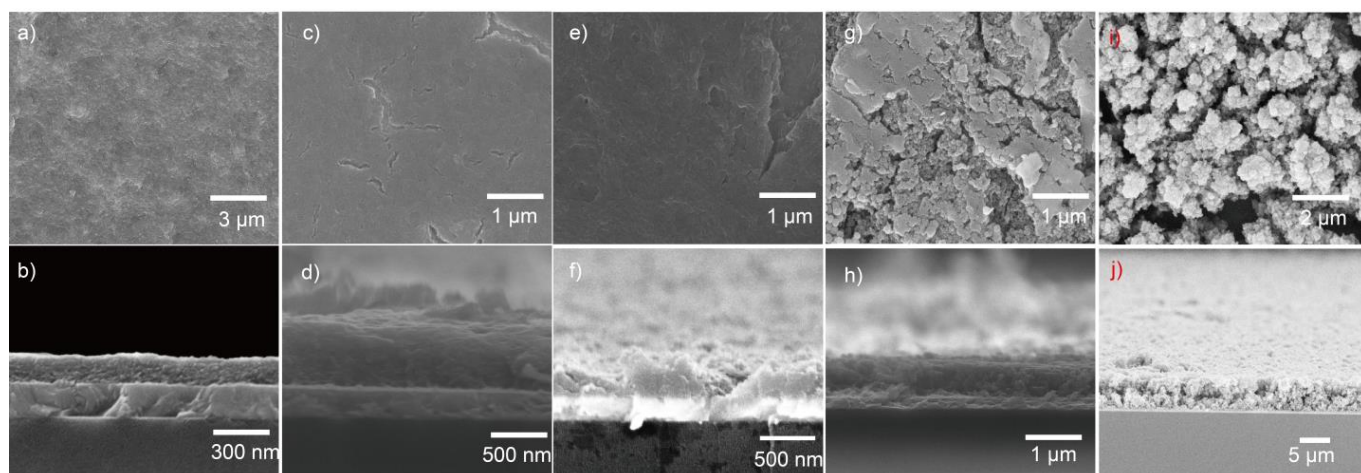

**Figure S6.** Top-view and cross-sectional SEM images of Cu-CAT-1 films on ITO substrate deposited at -0.1 V for 10 min from the supporting-electrolyte-free and air-saturated precursor solutions with  $\text{Cu}(\text{NO}_3)_2$  concentration of a, b) 1mM, c, d) 2mM, e, f) 3mM, g, h) 4mM, and i, j) 5mM. The molar ratio of  $\text{Cu}(\text{NO}_3)_2/\text{H}_6\text{HHP}$  is fixed to 3:2.

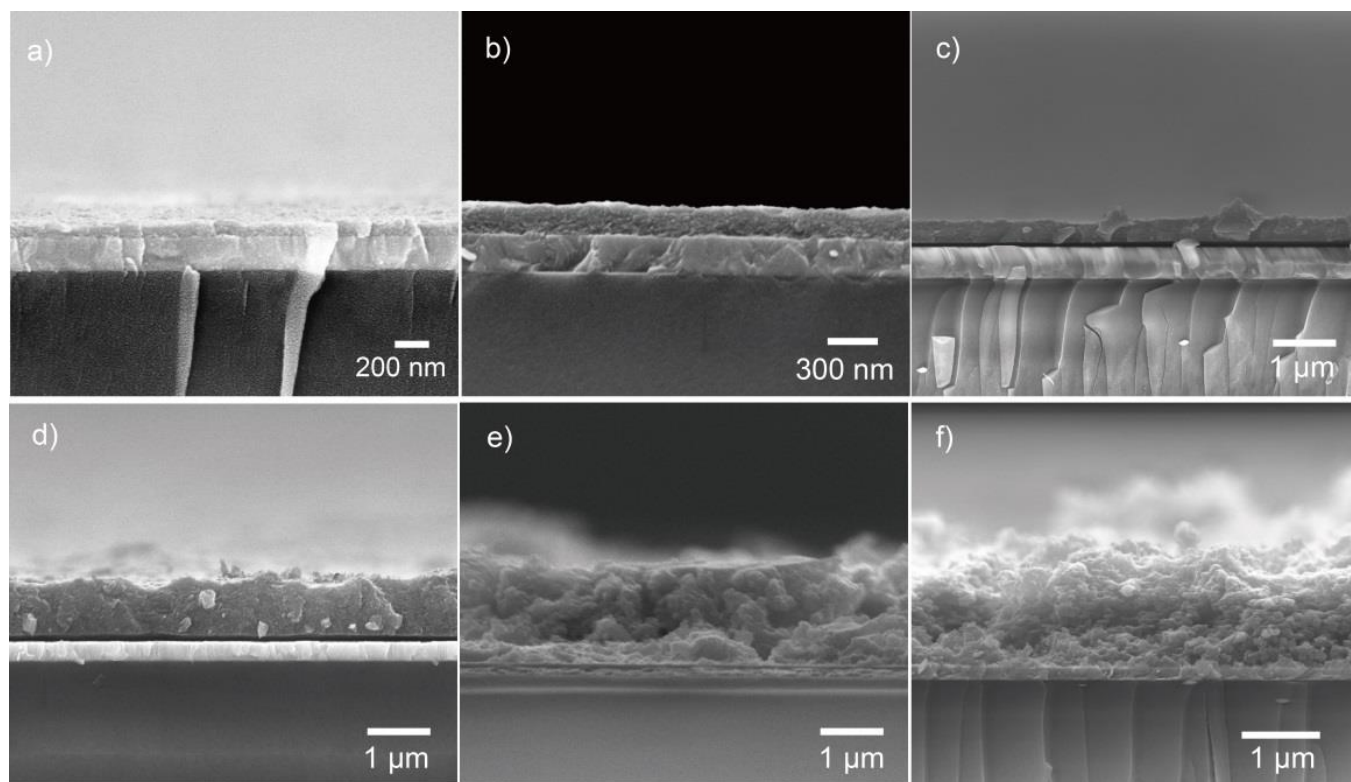

**Figure S7.** Cross-sectional SEM images of Cu-CAT-1 films on ITO substrate deposited at a) 0 V, b) -0.1 V, c) -0.2 V, d) -0.3 V, e) -0.4 V, and f) -0.5 V (versus Ag/AgCl) for 10 min. The air-saturated and supporting electrolyte-free precursor solution containing 1 mM  $\text{Cu}(\text{NO}_3)_2$  and 0.66 mM  $\text{H}_6\text{HHP}$  was used for the cathodic synthesis.

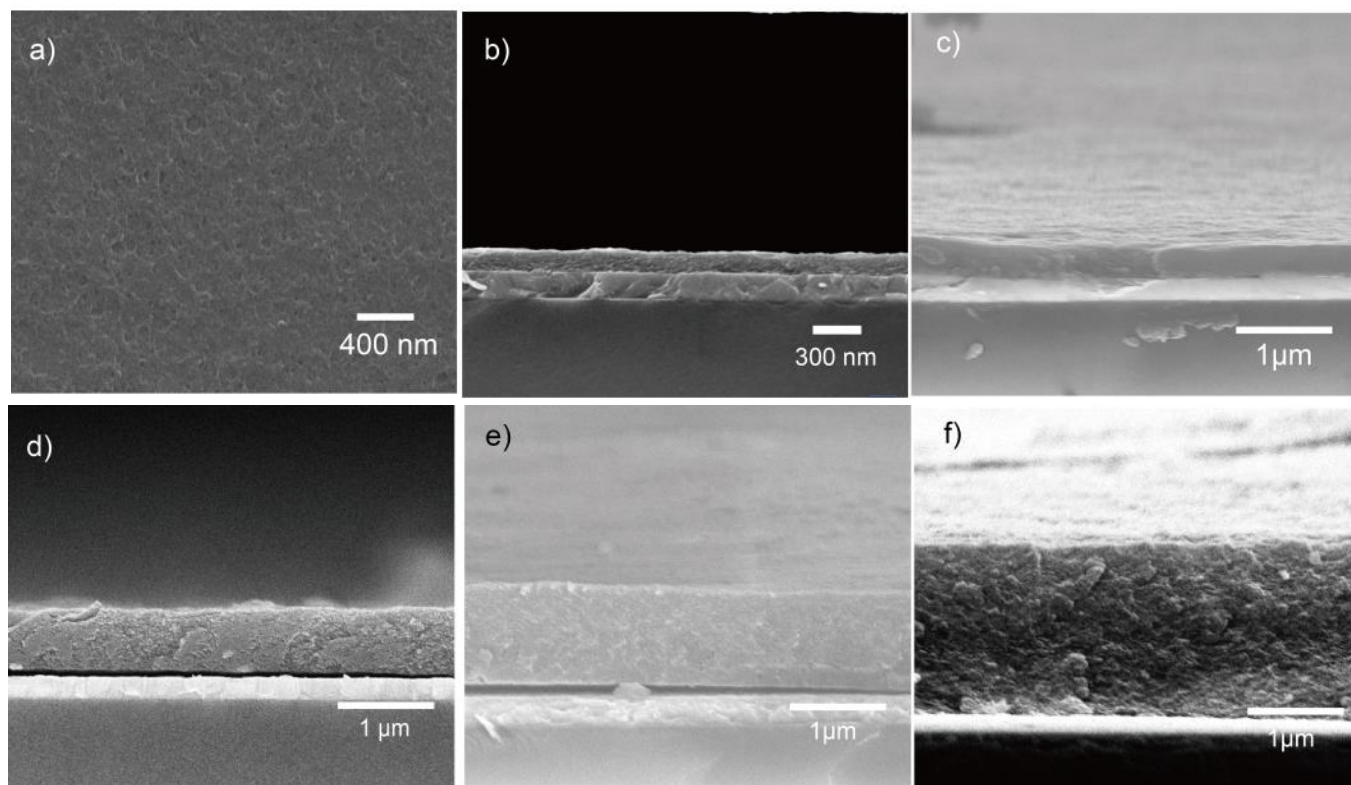

**Figure S8.** Top-view and cross-sectional SEM images of Cu-CAT-1 films on ITO substrate prepared by depositing at -0.1 V for a) 1, b) 10, c) 20, d) 30, e) 60, and f) 120 min from the air-saturated and supporting electrolyte-free precursor solution containing 1 mM  $\text{Cu}(\text{NO}_3)_2$  and 0.66 mM  $\text{H}_6\text{HHP}$ .
